# Supplementary figures and images for: ERK signaling is required for eye-specific retino-geniculate segregation
Source: Oxford University Press journal article supplement (doi:10.1242/dev.01212), 2004-06-24

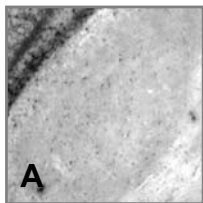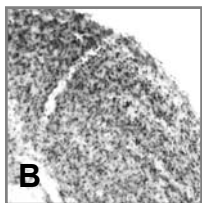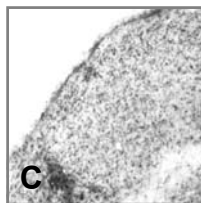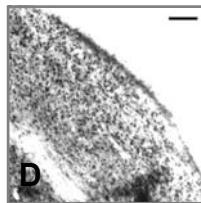

**E**

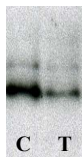

24hr

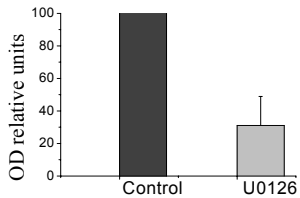

Supplement: dev01212-sup-s1.pdf [file dev01212-sup-s1.pdf]
